# Supplementary material
Source: publisher figshare collection journal article supplement (https://gsajournals.figshare.com/ndownloader/files/26785997)

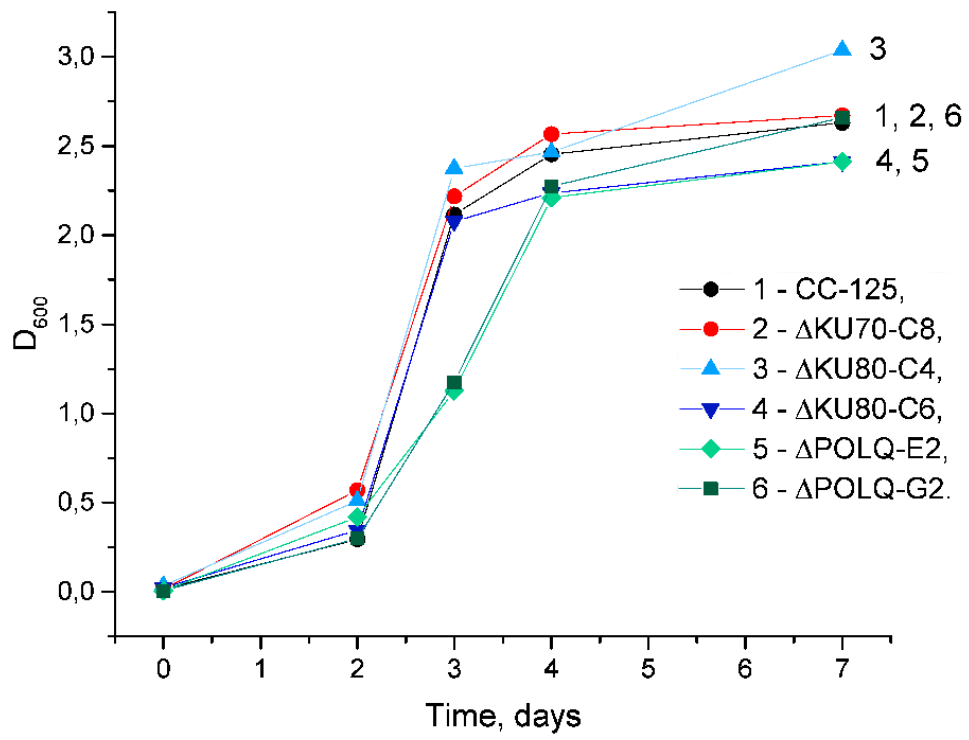

**Figure S1** Growth curves of the parental CC-125 strain and mutants in TAP liquid media.

Supplement: Supplementary file 1 [file 26785997]
